# Supplementary material
Source: publisher figshare collection journal article supplement (https://gsapubs.figshare.com/ndownloader/files/23307275)
Supplement: Supplementary file 1 [file 23307275]

Del Vecchio, J., DiBiase, R.A., Denn, A.R., Bierman, P.R., Caffee, M.W., and Zimmerman, S.R., 2018, Record of coupled hillslope and channel response to Pleistocene erosion and deposition in a sandstone headwater valley, central Pennsylvania: GSA Bulletin, <https://doi.org/10.1130/B31912.1>.

## DATA REPOSITORY

**Table DR1.** Soil horizon sampling by soil pit.

**Table DR2.** Point count locations and results.

**Table DR3.** Cosmogenic nuclide data (Table DR3.xls).

### Supplementary figures

**Figure DR1.** Overview map highlighting clast size point count locations.

**Figure DR2.** Overview map of soil pit locations.

**Figure DR3.** Constraints on the depth of the hiatus surface based on  $^{10}\text{Be}$  concentration of middle core sample.

**Figure DR4.** The effect of the range in possible inheritance of buried grains,  $N_{10\text{Be}}^{\text{inh}}$ , on the predicted  $[^{26}\text{Al}]/[^{10}\text{Be}]$  ratio in core samples for a burial age  $t_0 = 340$  ka.

**Figure DR5.** Sensitivity of predicted  $[^{26}\text{Al}]/[^{10}\text{Be}]$  ratios in core samples to the assumed production rate ratio  $R_{26/10}$ .

**Figure DR6.** Predicted range of  $[^{26}\text{Al}]/[^{10}\text{Be}]$  ratios in core samples due to variability in the inherited  $[^{26}\text{Al}]/[^{10}\text{Be}]$  ratio,  $N_{26\text{Al}}^{\text{inh}}/N_{10\text{Be}}^{\text{inh}}$ .

**Figure DR7.** Predictions of inherited  $^{10}\text{Be}$  concentrations in clasts for pulsed burial case with  $t_0 = 340$  ka and  $t_I = 16$  ka.

### Soil pit descriptions

**Supplementary dataset:** GR\_point\_count\_data.csv contains all individual measurements from field point counts in centimeters, which are summarized in Table DR2.

## References

**Table DR1: Soil horizon sampling by soil pit<sup>1</sup>**

| <b>TMMS</b>       |                | <b>LRVF</b>       |                | <b>LRMS</b>       |                | <b>LRRT</b>       |                |
|-------------------|----------------|-------------------|----------------|-------------------|----------------|-------------------|----------------|
| <i>Depth (cm)</i> | <i>Horizon</i> |
| 0-6               | A              | 0-10              | E              | 0-12              | E              | 0-5               | E              |
| 6-21              | AE             | 10-14             | Bhs            | 12-15             | Bhs            | 5-7               | Bhs            |
| 21-37             | Bw1            | 14-20             | Bs             | 15-26             | Bs             | 7-14              | Bs             |
| 37-75             | Bw2            | 20-32             | Bw1            | 26-50             | Bw1            | 14-33             | Bw1            |
| 75-95+            | Bw3            | 32-65+            | Bw2            | 50-72             | Bw2            | 33-60             | Bw2            |
|                   |                |                   |                | 72-145            | C              | 60-95             | Bt             |
|                   |                |                   |                |                   |                | 95-138            | BC             |
|                   |                |                   |                |                   |                | 138-155+          | 2Cr            |

<sup>1</sup>Reproduced from Brantley et al. 2016

**Table DR2.** Summary of point count locations and results.

| Site ID | Easting | Northing | N <sup>1</sup> | D <sub>min</sub> (cm) <sup>2</sup> | D <sub>16</sub> (cm) | D <sub>50</sub> (cm) | D <sub>84</sub> (cm) | D <sub>max</sub> (cm) | Cover type             |
|---------|---------|----------|----------------|------------------------------------|----------------------|----------------------|----------------------|-----------------------|------------------------|
| TMOB1   | 252743  | 4509567  | 77             | 20                                 | 28                   | 43                   | 69                   | 132                   | Open boulder field     |
| TMOB2   | 253015  | 4509661  | 51             | 16                                 | 28                   | 45                   | 70                   | 124                   | Open boulder field     |
| TMOB3   | 252810  | 4509520  | 79             | 14                                 | 20                   | 30                   | 44                   | 79                    | Open boulder field     |
| TMOB4   | 252977  | 4509547  | 65             | 10                                 | 19                   | 26                   | 37                   | 65                    | Open boulder field     |
| TMOB5   | 252985  | 4509480  | 95             | 11                                 | 21                   | 29                   | 43                   | 102                   | Open boulder field     |
| LRBC1   | 253474  | 4508925  | 92             | 12                                 | 21                   | 31                   | 42                   | 72                    | Canopied boulder field |
| LRBC2   | 253186  | 4508836  | 103            | 13                                 | 23                   | 35                   | 56                   | 115                   | Canopied boulder field |
| LRBC3   | 253149  | 4508944  | 103            | 14                                 | 21                   | 34                   | 53                   | 105                   | Canopied boulder field |
| LRBC4   | 253095  | 4509035  | 103            | 9                                  | 15                   | 22                   | 32                   | 60                    | Canopied boulder field |
| TMBC1   | 252800  | 4509558  | 108            | 10                                 | 18                   | 28                   | 44                   | 103                   | Canopied boulder field |
| TMBC2   | 253052  | 4509500  | 88             | 10                                 | 19                   | 29                   | 40                   | 62                    | Canopied boulder field |
| TMBC3   | 252898  | 4509414  | 102            | 11                                 | 17                   | 25                   | 35                   | 52                    | Canopied boulder field |
| TMBC4   | 253082  | 4509415  | 70             | 10                                 | 17                   | 26                   | 35                   | 59                    | Canopied boulder field |
| TMBS1   | 252808  | 4509625  | 52             | 12                                 | 16                   | 20                   | 30                   | 57                    | Boulder/soil mix       |
| TMBS2   | 252967  | 4509232  | 82             | 12                                 | 17                   | 23                   | 30                   | 57                    | Boulder/soil mix       |
| TMBS3   | 253032  | 4509165  | 40             | 11                                 | 15                   | 22                   | 27                   | 66                    | Boulder/soil mix       |
| TMBS4   | 253213  | 4509256  | 75             | 10                                 | 16                   | 23                   | 33                   | 77                    | Boulder/soil mix       |
| LRBS1   | 253324  | 4508936  | 54             | 10                                 | 19                   | 28                   | 35                   | 57                    | Boulder/soil mix       |
| LRBS2   | 253295  | 4509027  | 49             | 12                                 | 15                   | 23                   | 28                   | 47                    | Boulder/soil mix       |
| LRBS3   | 253186  | 4509091  | 68             | 7                                  | 14                   | 18                   | 26                   | 47                    | Boulder/soil mix       |
| B1      | 253332  | 4509604  | 100            | 12                                 | 25                   | 47                   | 86                   | 191                   | Open boulder field     |
| B2      | 253267  | 4509439  | 100            | 7                                  | 14                   | 20                   | 29                   | 62                    | Canopied boulder field |
| B3      | 253388  | 4509400  | 98             | 8                                  | 17                   | 23                   | 34                   | 110                   | Canopied boulder field |
| GPC01   | 253258  | 4509216  | 75             | f <sup>3</sup>                     | 1.0                  | 12                   | 21                   | 41                    | Channel                |
| GPC02   | 253188  | 4509148  | 112            | f                                  | 0.8                  | 15                   | 27                   | 66                    | Channel                |
| GPC03   | 253111  | 4509082  | 116            | f                                  | 1.9                  | 20                   | 33                   | 73                    | Channel                |
| GCP04   | 253030  | 4509032  | 99             | f                                  | 1.5                  | 13                   | 25                   | 59                    | Channel                |
| GPC05   | 248083  | 4505270  | 90             | f                                  | 5.4                  | 9.8                  | 16                   | 45                    | Channel                |
| GPC06   | 248129  | 4504988  | 106            | f                                  | 1.5                  | 9.3                  | 23                   | 58                    | Channel                |
| GPC07   | 250023  | 4506728  | 100            | f                                  | 3.3                  | 8.5                  | 15                   | 26                    | Channel                |
| GPC08   | 249550  | 4506569  | 99             | f                                  | f                    | 5.7                  | 12                   | 30                    | Channel                |

<sup>1</sup> N = number of clasts counted<sup>2</sup> D<sub>16</sub>, D<sub>50</sub> and D<sub>84</sub> refer to the 16th, 50th and 84th percentile of clast intermediate axis measurements, respectively. D<sub>min</sub> and D<sub>max</sub> refer to the minimum and maximum intermediate clast size observed.<sup>3</sup> f = fine (< 0.2 cm)

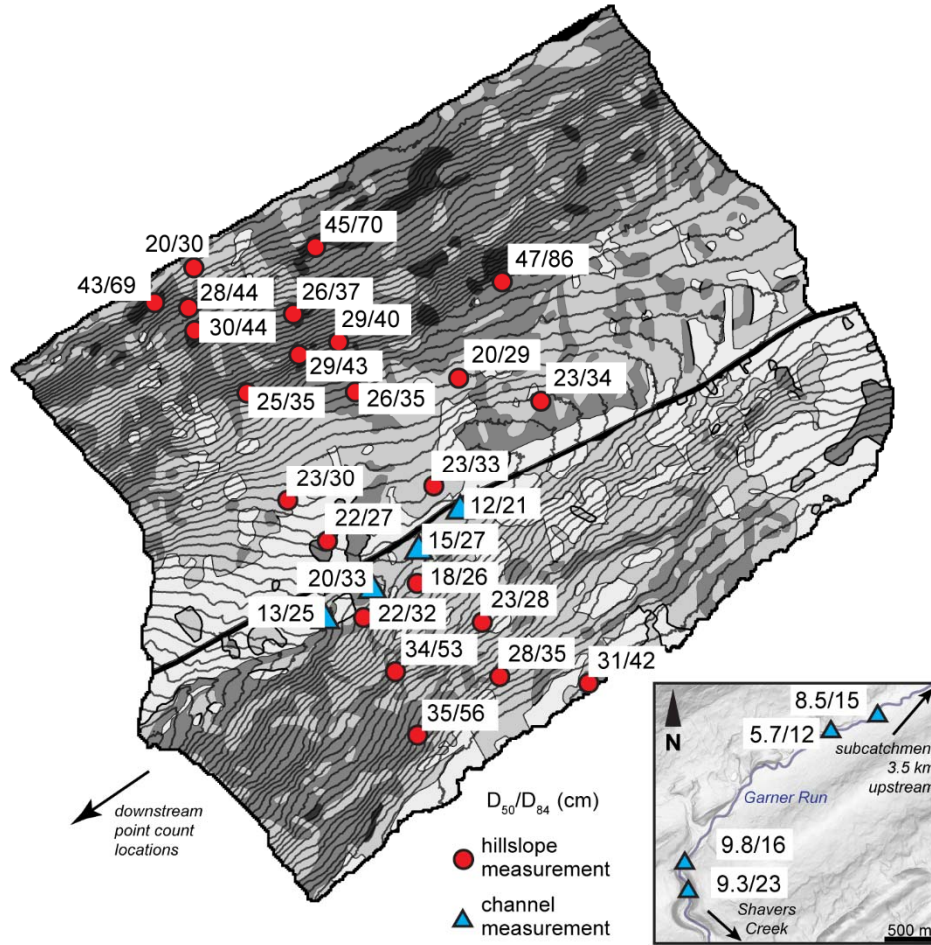

**Figure DR1:**  $D_{50}$  and  $D_{84}$ , in cm, of intermediate axis diameter of clasts on both hillslopes and channels. Inset shows channel point count observations downstream of subcatchment outlet.

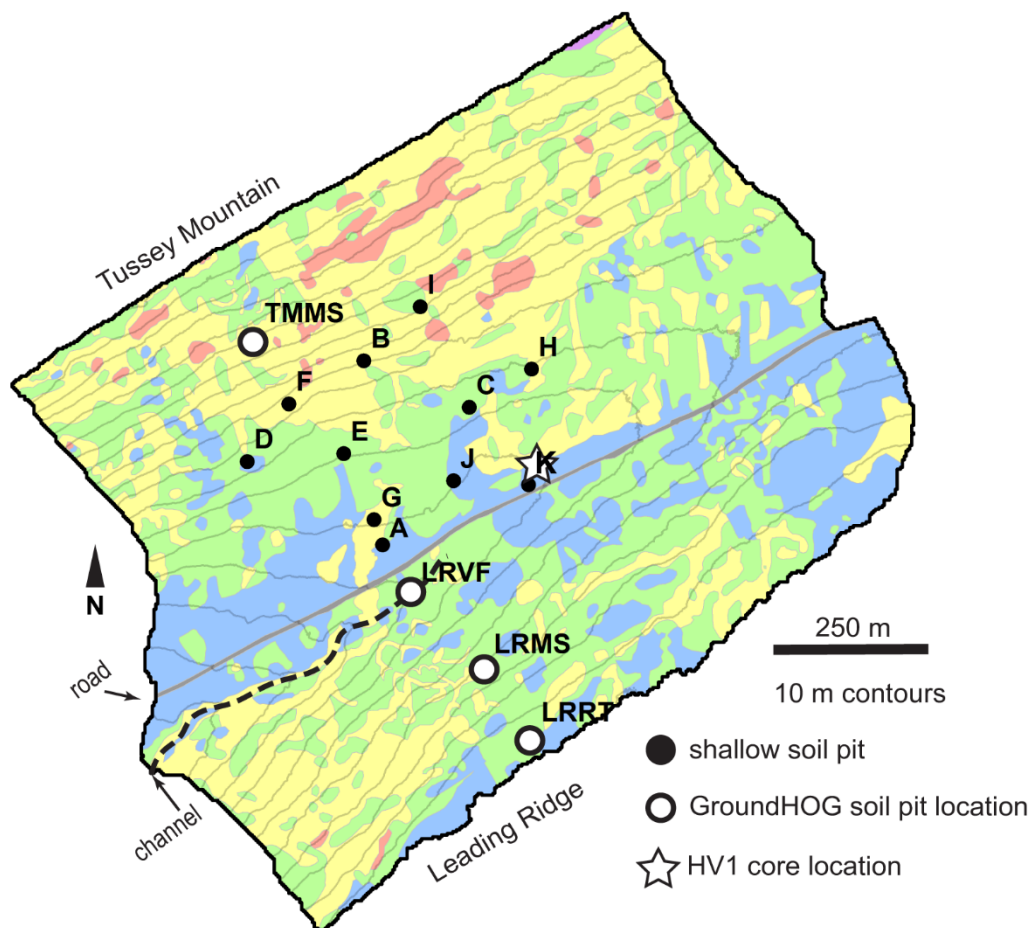

**Figure DR2.** Location of soil pit observations, including GroundHOG soil pits (Brantley et al., 2016) and shallow pits from this study (lettered; see profile descriptions in Data Repository).

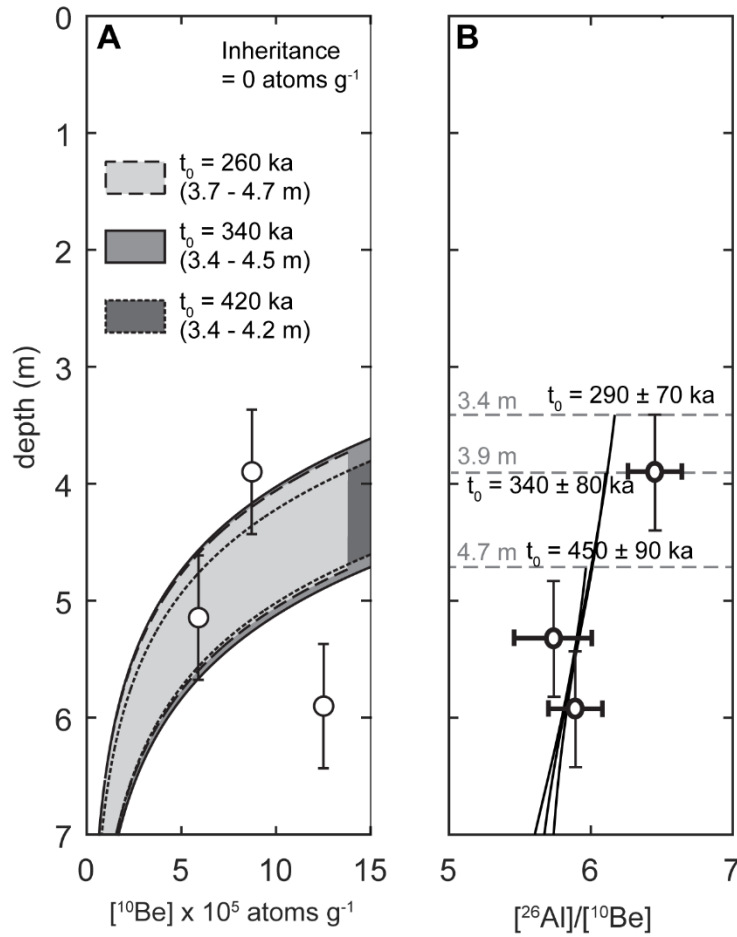

**Figure DR3.** Determining the influence of choice in hiatus depth on modeled ages, assuming  $t_I = 16$  ka. (A) Constraints on the depth of the hiatus surface based on the concentration of  $^{10}\text{Be}$  in the middle clast at a depth of  $5.3 \pm 0.5$  m for the end-member case of no inherited  $^{10}\text{Be}$ . For the minimum burial age of 260 ka, the light gray envelope demonstrates possible hiatus depths between 3.7 and 4.7 m. For a burial age of 340 ka, the medium gray envelope demonstrates possible hiatus depths between 3.4 and 4.5 m. The darkest gray envelope demonstrates the possible hiatus depths of 3.4 to 4.2 m depth given the maximum burial age of 420 ka. (B) Sensitivity of inferred value of  $t_0$  for hiatus depths ranging from 3.4-4.7 m. (B) Depending on the depth of the hiatus surface the best-fitting burial ages changes, with a deeper hiatus allowing for older burial ages and a shallower hiatus allowing for a younger burial age. Hiatus depths are shown as dashed gray lines, along with the burial age corresponding to each of the three model outputs.

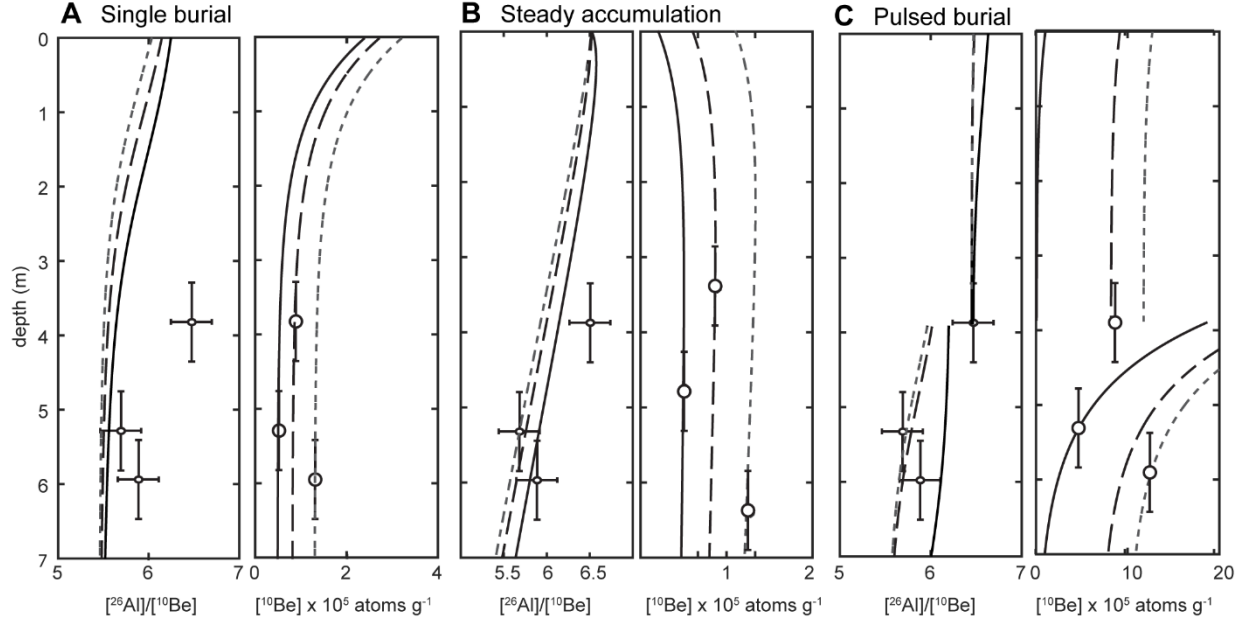

**Figure DR4.** The effect of the range in possible inheritance of buried grains,  $N_{10\text{Be}}^{\text{inh}}$ , on the predicted  $[^{26}\text{Al}]/[^{10}\text{Be}]$  ratio in core samples for a burial age  $t_0 = 340$  ka. Three curves indicate predictions constrained to match the modern  $^{10}\text{Be}$  concentration of each clasts. In the single burial (A) and steady accumulation (B) cases, inherited concentrations of  $^{10}\text{Be}$  do not result in significant variability of  $[^{26}\text{Al}]/[^{10}\text{Be}]$ . For the pulsed burial case (C), the relatively low concentration of  $^{10}\text{Be}$  exhibited by the middle clast results in predicted  $[^{26}\text{Al}]/[^{10}\text{Be}]$  inconsistent with observations, likely due to variable inheritance or more complicated exposure history.

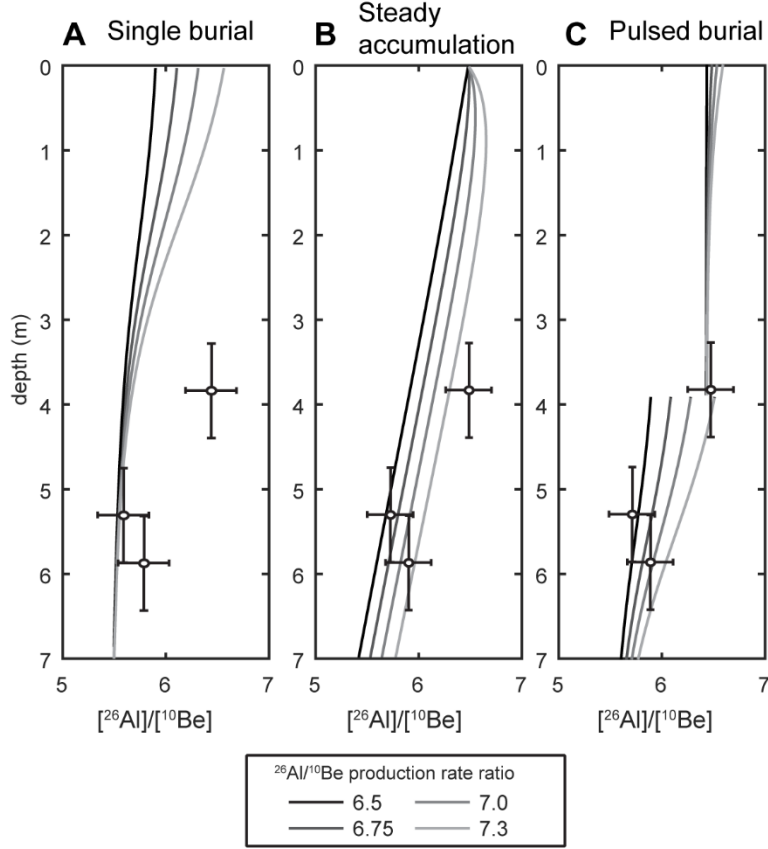

**Figure DR5.** Sensitivity of predicted  $[^{26}\text{Al}]/[^{10}\text{Be}]$  ratios in core samples to the assumed production rate ratio  $R_{26/10}$ , assuming  $t_0 = 340$  ka,  $t_l = 16$  ka, and  $N_{10\text{Be}}^{inh} = 6.5$ . (A) For the single burial case, the range of surface production ratios do not result in significant variability of  $[^{26}\text{Al}]/[^{10}\text{Be}]$  at depths greater than 3 m. (B) For the steady accumulation case, surface production rate ratio directly influences predicted  $[^{26}\text{Al}]/[^{10}\text{Be}]$  at depth, but cannot reconcile measured values. (C) For the pulsed burial case, a higher surface production ratio requires older burial times for samples at depth.



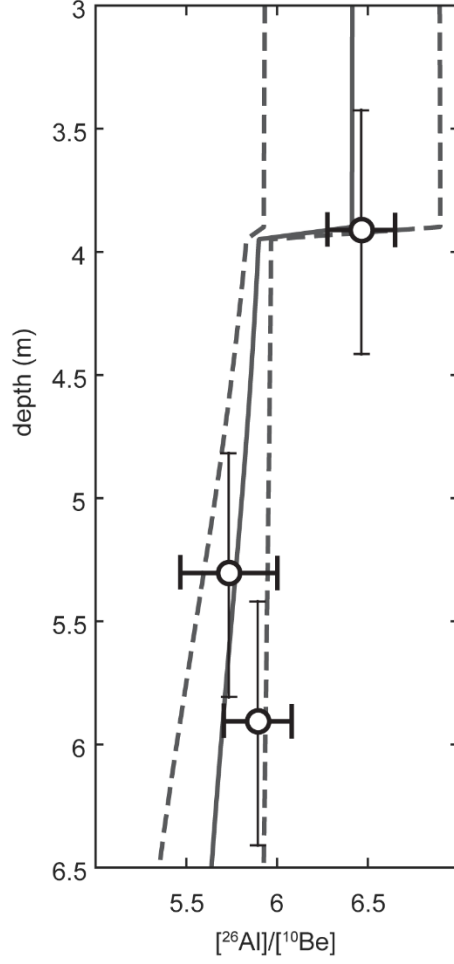

**Figure DR6.** Predicted range of  $[^{26}\text{Al}]/[^{10}\text{Be}]$  ratios in core samples due to variability in the inherited  $[^{26}\text{Al}]/[^{10}\text{Be}]$  ratio,  $N_{26\text{Al}}^{\text{inh}}/N_{10\text{Be}}^{\text{inh}}$ , generated from a normal distribution with mean of 6.5 and standard deviation of 0.48 based on the mean and standard deviation measured surface clasts (Table 1, main text). Solid line indicates mean and dashed lines indicate  $1\sigma$  spread from 1000 simulations, for case where  $t_0 = 340$  ka and  $t_l = 16$  ka.

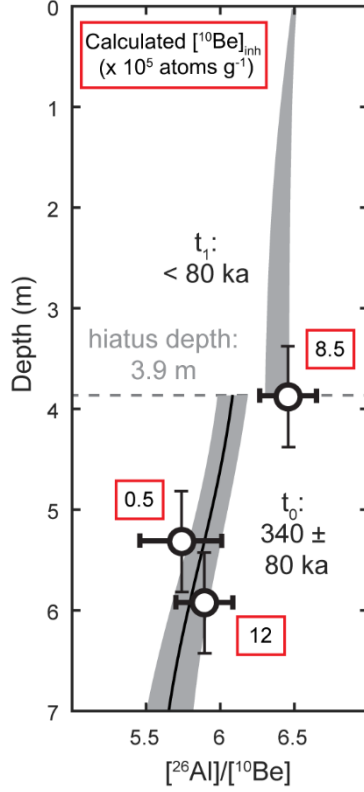

**Figure DR7.** Predictions of inherited  $^{10}\text{Be}$  concentrations in clasts for pulsed burial case with  $t_0 = 350$  ka and  $t_i = 16$  ka. Initial  $^{10}\text{Be}$  concentrations of buried clasts,  $N_{10\text{Be}}^{\text{inh}}$ , were determined by using an initial, inherited concentration that, given our favored scenario of  $t_0=340$  ka, resulted in a final, modern  $^{10}\text{Be}$  concentration that best fit the observed concentrations of  $^{10}\text{Be}$  measured in samples (the same process is shown graphically in Fig. DR4).

## Soil pit descriptions

Soil horizons were described using a standard NRCS pedon description form. Dry and moist colors were determined in the field according to the Munsell® soil color book. Where described, texture was determined by feel in the lab (modified from Thien 1979).

### Profile A

07-10-2015

253113 E, 4509192 N

Soil-mantled, adjacent to boulder canopy in valley floor

|          |           |                                                                                     |
|----------|-----------|-------------------------------------------------------------------------------------|
| 0-34+ cm | O/A and B | Very clayey soil with boulders mixed in; Dense root assemblage in first 10 cm or so |
|----------|-----------|-------------------------------------------------------------------------------------|

### Profile B

07-10-2015

253082 E, 4509495 N

Steep; soil-mantled pit flanked by boulder patches

|        |     |                       |
|--------|-----|-----------------------|
| 0-8 cm | O/A | <i>no description</i> |
|--------|-----|-----------------------|

|         |   |                       |
|---------|---|-----------------------|
| 8-17 cm | E | <i>no description</i> |
|---------|---|-----------------------|

|        |   |                                                                                                 |
|--------|---|-------------------------------------------------------------------------------------------------|
| 17+ cm | B | sandy brownish yellow layer, fine-grained but still gritty. Very sandy to medium/coarse gravels |
|--------|---|-------------------------------------------------------------------------------------------------|

### Profile C

07-15-2015

253256 E, 4509418 N

On top of lobe and just uphill of toeslope boulder field

|         |     |                       |
|---------|-----|-----------------------|
| 0-14 cm | O/A | <i>no description</i> |
|---------|-----|-----------------------|

|           |   |                                                      |
|-----------|---|------------------------------------------------------|
| 14-27+ cm | E | Crumbly, not clayey. Peds have roots. Rock at 27 cm. |
|-----------|---|------------------------------------------------------|

### Profile D

07-15-2015

252890 E, 4509329 N

Soil pit at the foot of boulders, soil-mantled

|        |     |                       |
|--------|-----|-----------------------|
| 0-7 cm | O/A | <i>no description</i> |
|--------|-----|-----------------------|

|          |   |                       |
|----------|---|-----------------------|
| 7-20+ cm | B | brown/red clayey soil |
|----------|---|-----------------------|

### Profile E

07-29-2015

0243049 E, 4509342 N

Bouldery soil, Tussey side, valley floor

|          |   |                                                                                                                                                                                                                                                                                                                                                                                                                          |
|----------|---|--------------------------------------------------------------------------------------------------------------------------------------------------------------------------------------------------------------------------------------------------------------------------------------------------------------------------------------------------------------------------------------------------------------------------|
| 6-0 cm   | O | crumbly w/ roots forming a mat, dry                                                                                                                                                                                                                                                                                                                                                                                      |
| 0-3 cm   | E | No rock fragments in E. Sparse root assemblage. 2-3 VF roots. Color: 7.5YR 5/3. Subrounded blocky peds, fine-medium. Wavy boundary                                                                                                                                                                                                                                                                                       |
| 4-20+ cm | B | Varied spatial distribution of roots: some areas with 2-3 VF roots, others with 6-7 F roots. Rock fragments of quartzite, volumetrically less than 5%. 0-17 cm depth contains coarse, gravel-cobble sized fragments in a soil matrix. 17+ cm rock fragments cease to be seen in the observable horizon. Peds are coarse to very coarse in size, angular-subangular blocky. Color: 7.5YR 5/6. Lower boundary not observed |

#### Profile F

07-30-15

252959 E, 4509424 N

Boulder canopy, steep Tussey Mountain side

|           |    |                                                                                                                                                                                                                                                                  |
|-----------|----|------------------------------------------------------------------------------------------------------------------------------------------------------------------------------------------------------------------------------------------------------------------|
| 4-0 cm    | O  | <i>no description</i>                                                                                                                                                                                                                                            |
| 0-6 cm    | A  | 10YR 2/1 (10YR 2/1 moist), clear wavy boundary, sandy clay loam, many very fine/fine roots throughout. Very friable, slightly sticky, moderately plastic                                                                                                         |
| 6-13 cm   | E  | 7.5 YR 6/2 (10YR 4/2 moist), clear wavy boundary, sandy clay loam. 60% subrounded quartzite cobbles. Some very fine/fine roots throughout. Friable, slightly sticky, moderately plastic                                                                          |
| 13-16 cm  | B1 | 7.5 YR 3/3 (7.5 YR 4/3 moist), broken boundary, sandy clay loam. 60% subrounded quartzite coarse gravel to cobbles. Many very fine/fine roots throughout. Very friable, slightly sticky, moderately plastic                                                      |
| 16-26+ cm | B2 | 7.5 YR 4/4 (7.5 YR 4/3 moist), broken boundary, sandy clay loam. 75% subrounded quartzite coarse gravel to cobbles. Some medium to coarse roots throughout. Friable, slightly sticky, moderately plastic. Lower boundary not observed (large boulder in the way) |

#### Profile G

07-30-2015

253099 E, 4509233 N

Boulder canopy in valley floor. Angry ants.

|          |   |                                                                                                                                                                                                                                      |
|----------|---|--------------------------------------------------------------------------------------------------------------------------------------------------------------------------------------------------------------------------------------|
| 4-0 cm   | O | <i>no description</i>                                                                                                                                                                                                                |
| 0-7 cm   | A | 7.5 YR 2.5/1 (10YR 3/1 moist), clear wavy boundary, loam. 60% subangular quartzite cobbles. Many very fine to fine roots throughout, few medium roots throughout. Friable, slightly sticky, very plastic.                            |
| 7-35+ cm | B | 7.5 YR 4/4 (10 YR 5/4 moist), silty clay. From 7-30 cm, 60% subrounded quartzite cobbles; from 30+ cm, 20% subrounded coarse gravel. Many fine roots throughout, few coarse roots throughout. Firm, moderately sticky, very plastic. |

#### Profile H

07-06-2016

4509481 N, 253359 E

|           |   |                                                                          |
|-----------|---|--------------------------------------------------------------------------|
| +5 – 0 cm | O | Organic horizon; largely leaves with very fine to fine roots throughout. |
|-----------|---|--------------------------------------------------------------------------|

|             |     |                                                                                                                                                                                                                                                                                                     |
|-------------|-----|-----------------------------------------------------------------------------------------------------------------------------------------------------------------------------------------------------------------------------------------------------------------------------------------------------|
| 0 – 3 cm    | O/A | Organic horizon; fewer roots, with some very fine sand grains                                                                                                                                                                                                                                       |
| 3 – 16 cm   | E   | Sandy clay loam. 7.5YR 6/2 color (7.5YR 5/2 moist). Abrupt wavy boundary. Moderate sub-angular blocky structure, with dark organic stains on pedon surfaces. Few fine tubular pores. Common very fine to fine roots and few medium roots throughout. Abundant gravel to cobble size rock fragments. |
| 16 – 46+ cm | B   | 7.5YR 3/4 color (5YR 3/4 moist), with 5YR 3/3 (5YR 2.5/2 moist) color mottles associated with weathering rinds on clasts. Gradual wavy boundary. Moderate granular structure. Common fine roots and few medium roots throughout. Few medium gravel to cobble size rock fragments throughout.        |

#### **Profile I**

07-06-2016

4509583 N, 253175 E

|             |   |                                                                                                                                                                                                                                                                                                                          |
|-------------|---|--------------------------------------------------------------------------------------------------------------------------------------------------------------------------------------------------------------------------------------------------------------------------------------------------------------------------|
| +14 – 0 cm  | O | Organic horizon                                                                                                                                                                                                                                                                                                          |
| 0 – 30 cm   | E | 7.5YR 6/2 color (7.5YR 6/2 moist). Moderate sub-angular blocky structure, with 7.5YR 5/6 color pedons. Rocky boundary. Few to common coarse roots and common fine roots throughout. Few coarse and common fine dendritic tubular pores. Abundant sub-angular to sub-rounded medium gravel to cobble size rock fragments. |
| 30 - 47+ cm | B | Sandy clay loam. 10YR 5/6 color (10YR 4/4 moist). Moderate sub-angular blocky structure. Rocky, gradual irregular boundary. Few coarse roots, common medium roots, and few to common fine roots throughout. Few very fine tubular pores. Sub-angular to sub-rounded coarse gravel to cobble size rock fragments.         |

#### **Profile J**

07-07-2016

253230 E, 4509297 N

Below lobe

|            |   |                                                                                                                                                     |
|------------|---|-----------------------------------------------------------------------------------------------------------------------------------------------------|
| +3 – 0 cm  | O | Organic horizon                                                                                                                                     |
| 0 – 4 cm   | E | 7.5YR 5/2 color (7.5YR 4/2 moist). Clear wavy boundary. Common fine roots and few medium roots throughout. Medium gravel to cobble fragment blocks. |
| 4 – 16+ cm | B | 10YR 6/6 color (10YR 5/6 moist). Common fine roots and few medium roots throughout. Medium gravel to cobble fragment blocks.                        |

#### **Profile K**

7-7-2016

253354 E, 4509290 N

Just above lobe

|           |   |                 |
|-----------|---|-----------------|
| +2 – 0 cm | O | Organic horizon |
|-----------|---|-----------------|

|            |   |                                                                                                                                                 |
|------------|---|-------------------------------------------------------------------------------------------------------------------------------------------------|
| 0 – 5 cm   | E | Medium gravelly. 7.5YR 3/2 color (7.5YR 2.5/2 moist). Abrupt smooth boundary. Common fine roots throughout.                                     |
| 5 – 15+ cm | B | Medium gravelly to cobbly. 10YR 5/6 color (10YR 4/6 moist). Sub-angular blocky structure. Common fine roots and common coarse roots throughout. |

## References

S.J. Thien. 1979. *A flow diagram for teaching texture by feel analysis*. Journal of Agronomic Education. 8:54-55
